# Supplementary material
Source: MDPI journal article supplement (https://www.mdpi.com/1999-4907/8/7/224)
Supplement: s1 [file s1]

**Table S1.** *p* values from ANOSIM (upper right side) and PERMANOVA (lower left side) pair-wise comparison of band compositions of 18S- and 16S-DGGE.

|  | **Fungi (18S-DGGE)** | | | | | **Bacteria (16S-DGGE)** | | | | | **Actinobacteria (16S-DGGE)** | | | | |
| --- | --- | --- | --- | --- | --- | --- | --- | --- | --- | --- | --- | --- | --- | --- | --- |
| **Class** | **1** | **2** | **3** | **4** | **5** | **1** | **2** | **3** | **4** | **5** | **1** | **2** | **3** | **4** | **5** |
| 1 |  | **0.03** | **0.03** | **0.03** | **0.03** |  | **0.03** | **0.03** | **0.03** | **0.03** |  | **0.03** | **0.03** | **0.03** | **0.03** |
| 2 | **0.03** |  | **0.03** | **0.03** | **0.03** | **0.03** |  | **0.03** | **0.03** | **0.03** | **0.03** |  | 0.11 | **0.03** | 0.17 |
| 3 | **0.03** | **0.03** |  | **0.03** | **0.03** | **0.03** | **0.03** |  | **0.03** | **0.03** | **0.03** | 0.11 |  | **0.03** | 0.28 |
| 4 | **0.03** | **0.03** | **0.03** |  | 0.14 | **0.03** | **0.03** | **0.03** |  | **0.03** | **0.03** | **0.03** | **0.03** |  | 0.62 |
| 5 | **0.03** | **0.03** | **0.03** | 0.06 |  | **0.03** | **0.03** | **0.03** | **0.03** |  | **0.03** | 0.20 | 0.09 | 0.51 |  |

Significant values (*p* < 0.05) in boldface.

**Table S2.** Pearson correlation matrix of chemical, microbiological and biochemical parameters measured in deadwood samples from the different decay classes.

|  | **TN** | **TC** | **C/N** | **Moist** | **CO2** | **NO2** | **CH4** | **F-Rich** | **B-Rich** | **A-Rich** | **Cell** | **Phosp** | **-gluc** | **NAG** | **Xyl** | **But** | **Acet** | **Aryl** |
| --- | --- | --- | --- | --- | --- | --- | --- | --- | --- | --- | --- | --- | --- | --- | --- | --- | --- | --- |
| TN | 1 | n.s. | -0.92** | n.s. | **0.97***** | **0.95**** | n.s. | n.s. | n.s. | **-0.90**** | 0.81* | n.s. | 0.86* | **0.97***** | **0.92**** | **0.95**** | **0.89**** | **0.97***** |
| TC |  | 1 | n.s. | n.s. | n.s. | n.s. | n.s. | n.s. | n.s. | n.s. | n.s. | n.s. | n.s. | n.s. | n.s. | n.s. | n.s. | n.s. |
| C/N |  |  | 1 | n.s. | **-0.94**** | **-0.98***** | **-0.85*** | **0.81*** | n.s. | **0.91**** | n.s. | n.s. | n.s. | **-0.97***** | **-0.85*** | **-0.91**** | n.s. | **-0.95**** |
| Moist |  |  |  | 1 | **0.83*** | n.s. | **0.82*** | **-0.96***** | n.s. | **-0.88**** | n.s. | n.s. | n.s. | n.s. | **0.84*** | **0.82*** | n.s. | n.s. |
| CO2 |  |  |  |  | 1 | 0.94** | n.s. | **-0.85*** | n.s. | **-0.97***** | **0.84*** | n.s. | **0.88**** | **0.93**** | **0.96***** | **0.98***** | **0.91**** | **0.91**** |
| NO2 |  |  |  |  |  | 1 | n.s. | n.s. | n.s. | **-0.92**** | n.s. | n.s. | n.s. | **0.98***** | **0.89**** | **0.94**** | **0.84*** | **0.97***** |
| CH4 |  |  |  |  |  |  | 1 | **-0.95**** | n.s. | **-0.83*** | n.s. | n.s. | n.s. | n.s. | n.s. | n.s. | n.s. | n.s. |
| 18S-R |  |  |  |  |  |  |  | 1 | n.s. | 0.90** | n.s. | n.s. | n.s. | n.s. | **-0.81*** | **-0.82*** | n.s. | n.s. |
| 16SbR |  |  |  |  |  |  |  |  | 1 | n.s. | n.s. | n.s. | n.s. | n.s. | n.s. | n.s. | n.s. | n.s. |
| 16SaR |  |  |  |  |  |  |  |  |  | 1 | **-0.87*** | **-0.81*** | **-0.90**** | **-0.87*** | **-0.97***** | **-0.98***** | **-0.93**** | **-0.84*** |
| Cell |  |  |  |  |  |  |  |  |  |  | 1 | n.s. | 0.99*** | n.s. | 0.95** | 0.91** | 0.99*** | n.s. |
| Phosp |  |  |  |  |  |  |  |  |  |  |  | 1 | n.s. | n.s. | n.s. | n.s. | n.s. | n.s. |
| -gluc |  |  |  |  |  |  |  |  |  |  |  |  | 1 | n.s. | 0.97*** | 0.94** | 0.99*** | n.s. |
| NAG |  |  |  |  |  |  |  |  |  |  |  |  |  | 1 | 0.86* | 0.91** | n.s. | 0.99*** |
| Xyl |  |  |  |  |  |  |  |  |  |  |  |  |  |  | 1 | 0.99*** | 0.99*** | 0.84* |
| But |  |  |  |  |  |  |  |  |  |  |  |  |  |  |  | 1 | 0.96*** | 0.89** |
| Acet |  |  |  |  |  |  |  |  |  |  |  |  |  |  |  |  | 1 | n.s. |
| Aryl |  |  |  |  |  |  |  |  |  |  |  |  |  |  |  |  |  | 1 |

Only significant Pearson correlation coefficients (*r*-values) are reported; significant correlation between chemical and biochemical properties and between chemical or biochemical parameters and microbial community richness and diversity, are reported in boldface. TN, total N content; TC, total C content; Moist, moisture; F-Rich, fungal richness; B-Rich, bacterial richness; A-Rich, actinobacterial richness; Cell, cellobiohydrolase; Phosp, acid phosphatase; -gluc, -glucosidase; NAG, N-acetyl-β-glucosaminidase; Xyl, xylanase; But, butyrate esterase; Acet, acetate esterase; Aryl, arylsulphatase. **p* < 0.1; ***p* < 0.05; ****p* < 0.01.


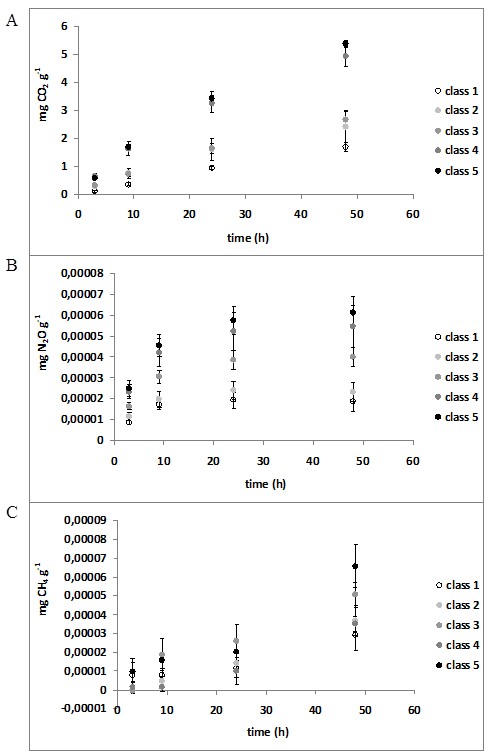


**Figure S1.** Cumulative production of CO2 (**A**), N2O (**B**) and CH4 (**C**)from the black pine deadwood of the five different decomposition classes, in the arc of 48 h. Vertical bars indicate standard errors of means (*n* = 4).


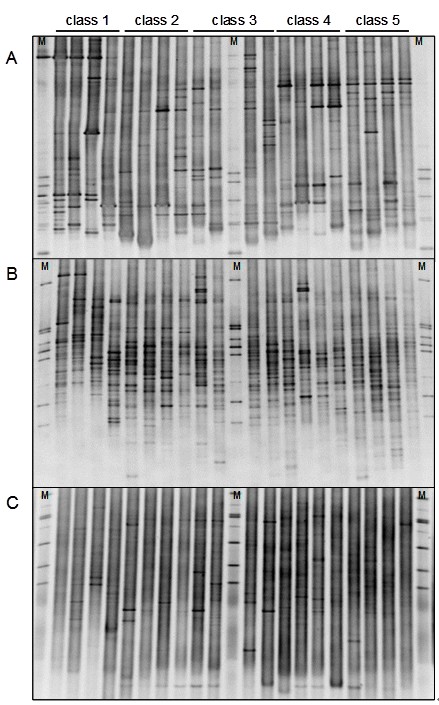


**Figure S2.** DGGE profiles of 18S rDNA fungal community (**A**), 16S rDNA bacterial community (**B**), and 16S rDNA actinobacterial community (**C**). The letter M on the gel images indicates the marker used for normalization of bands.
